# Supplementary material for: Self-propelled manganese oxide-based catalytic micromotors for drug delivery
Source: Royal Society of Chemistry journal article supplement (doi:10.1039/c6ra13739c), 2016-01-01
Supplement: c6ra13739c1.pdf [file c6ra13739c1.pdf]

## Supporting Information

# Self-propelled Manganese Oxide-Based Catalytic Micromotors for Drug Delivery

*Linlin Wang, Jun Chen, Xiaomiao Feng,\* Wenjin Zeng, Ruiqing Liu, xiujing Lin, Yanwen Ma\*  
and Lianhui Wang*

Key Laboratory for Organic Electronics and Information Displays & Institute of Advanced Materials (IAM), Jiangsu National Synergistic Innovation Center for Advanced Materials (SICAM), Nanjing University of Posts & Telecommunications, 9 Wenyuan Road, Nanjing 210023, China.

Corresponding Author

\*E-mail: iamxmfeng@njupt.edu.cn

\*E-mail: iamywma@njupt.edu.cn

**Video S1** Autonomous motion of PEDOT/MnO<sub>2</sub> microrockets in pure water with different H<sub>2</sub>O<sub>2</sub> concentrations ranging from 0.4% to 10% containing 0.33% Triton X-100.

**Video S2** Autonomous propulsion of PEDOT/MnO<sub>2</sub> microrockets in 25 μM BSA, 100 μM BSA and pure bovine serum with 2% H<sub>2</sub>O<sub>2</sub> and 0.33% Triton X-100.

**Video S3** Drug picking-up and transport in pure water with 4% H<sub>2</sub>O<sub>2</sub> containing 0.33% Triton X-100.

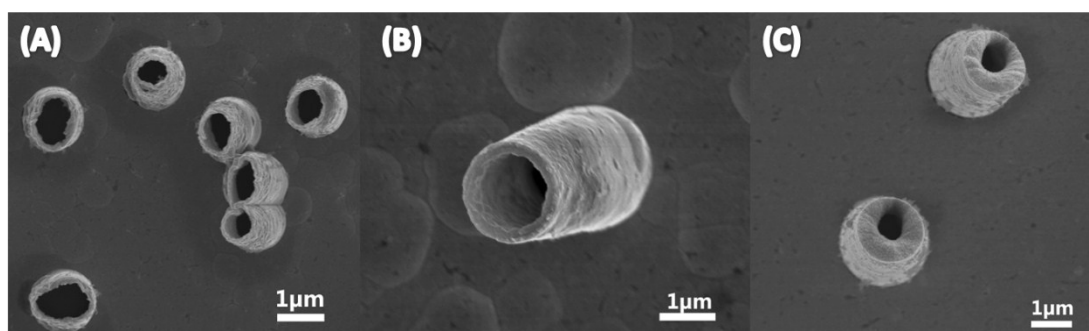

**Figure S1.** SEM images of PEDOT/MnO<sub>2</sub> microrockets with different electrodeposition time: 40 s (A), 60 s (B) and 80 s(C).

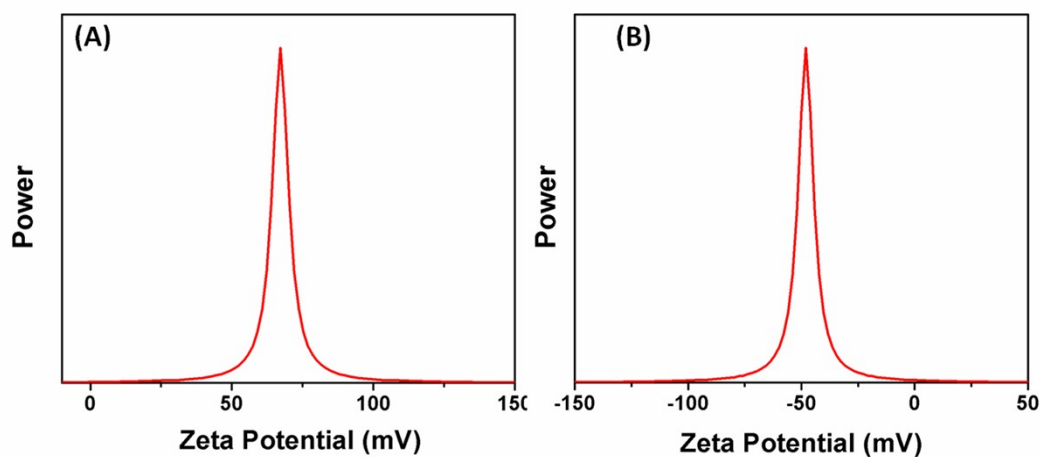

**Figure S2.** Zeta potential tests of the modified microrockets (A) and the drug CPT (B).
